# Supplementary material for: Point-of-care testing system enabling 30 min detection of influenza genes
Source: Royal Society of Chemistry journal article supplement (doi:10.1039/c0lc00519c), 2011-01-01
Supplement: c0lc00519c.pdf [file c0lc00519c.pdf]

## Electronic Supplementary Information

Table 1. Comparison of RT-PCR and POC NAT System in Testing Clinical Samples

|                                                 | H1pdm 2009<br>Specific Primer * |          | Influenza A<br>Consensus Primer ** |          | Housekeeping Gene<br>Primer *** |          |                |
|-------------------------------------------------|---------------------------------|----------|------------------------------------|----------|---------------------------------|----------|----------------|
|                                                 | Positive                        | Negative | Positive                           | Negative | Positive                        | Negative |                |
| Multiple-Gene<br>Detection test<br>(45 samples) | 23                              | 22       | 23                                 | 22       | 44                              | 1        | RT-PCR         |
|                                                 | 21 <sup>a</sup>                 | 24       | 21 <sup>a</sup>                    | 24       | 43 <sup>a</sup>                 | 2        | POC NAT System |
| Sensitivity test<br>(42 samples)                | 22                              | 20       | 22                                 | 20       | 42                              | 0        | RT-PCR         |
|                                                 | 20 <sup>b</sup>                 | 22       | N.D.                               | N.D.     | 16 <sup>c</sup>                 | 26       | POC NAT System |

\* The H1pdm-specific primer detects the HA gene in RT-PCR.

\*\* The influenza A consensus primer detects the matrix protein gene in RT-PCR.

\*\*\* The housekeeping gene primer detects the human RNase P gene in RT-PCR and the human  $\beta$ -actin in the POC NAT System.

a “Positive” was defined as the detection of a nucleic acid amplification signal in at least one of three wells within 30 min.

b “Positive” was defined as the detection of a nucleic acid amplification signal in at least one of eight wells within 30 min.

c Because we divided and diluted one swab sample for comparison between two methods in this experiment, the amount of sample was insufficient to detect human  $\beta$ -actin gene which was tested in only one well.
